# Supplementary material
Source: PubMed Central journal article supplement (PMC3948222)
Supplement: 1400421111_pnas.201400421SI.pdf [file 1400421111_pnas.201400421SI.pdf]

# Supporting Information

De Nisco et al. 10.1073/pnas.1400421111

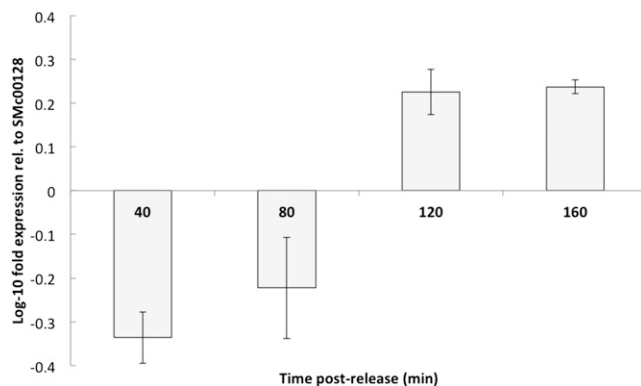

**Fig. S1.** Quantative PCR verification of *ctrA* gene expression during the cell cycle. Log<sub>10</sub> change in *ctrA* transcript levels at 40, 80, 120, and 160 min normalized by levels of *SMc00128* transcript, which are uniform in the microarray expression data. Transcription of *ctrA* is repressed in the beginning of the cell cycle and relieved during late S phase. Error bars represent the standard deviation between replicates.

## Other Supporting Information Files

[Datasets S1–S3 \(XLSX\)](#)
